# Supplementary material for: Emission enhancement of GFP chromophore in aggregated state via combination of self-restricted effect and supramolecular host–guest complexation
Source: Royal Society of Chemistry journal article supplement (doi:10.1039/c7ra00974g), 2017-01-01
Supplement: c7ra00974g1.pdf [file c7ra00974g1.pdf]

*Supplementary Information for*

**Emission enhancement of GFP chromophore in aggregated state via combination of self-restricted effect and supramolecular host-guest complexation**

Shanshan Ge, Hongping Deng,\* Yue Su and Xinyuan Zhu\*

*School of Chemistry and Chemical Engineering, State Key Laboratory of Metal Matrix Composites, Shanghai Jiao Tong University, 800 Dongchuan Road, Shanghai 200240, P. R. China.*

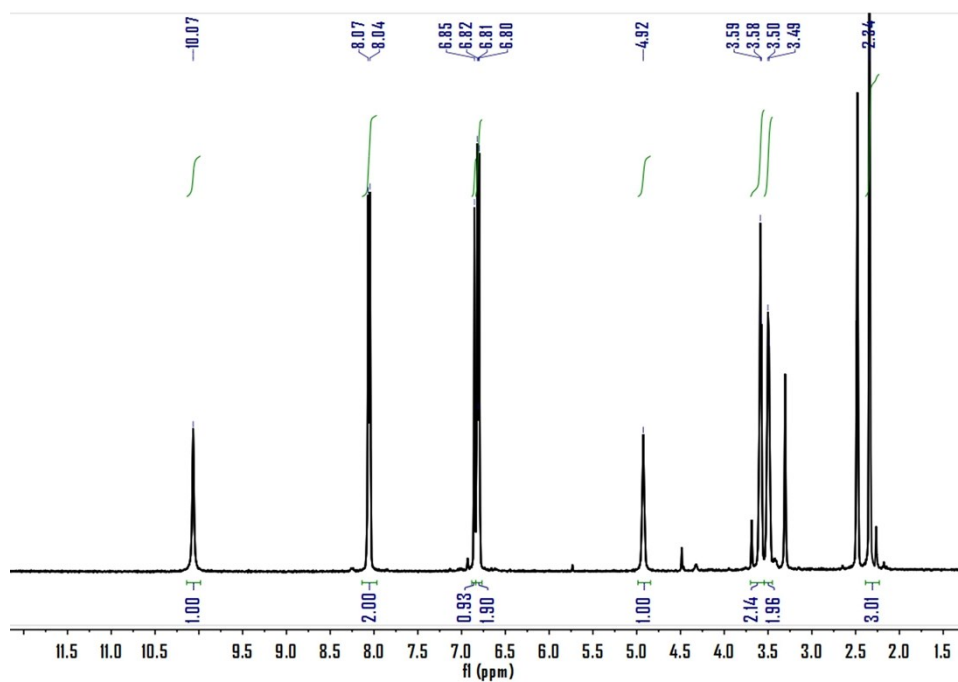

**Figure S1.** The <sup>1</sup>H NMR spectrum of HBHI.

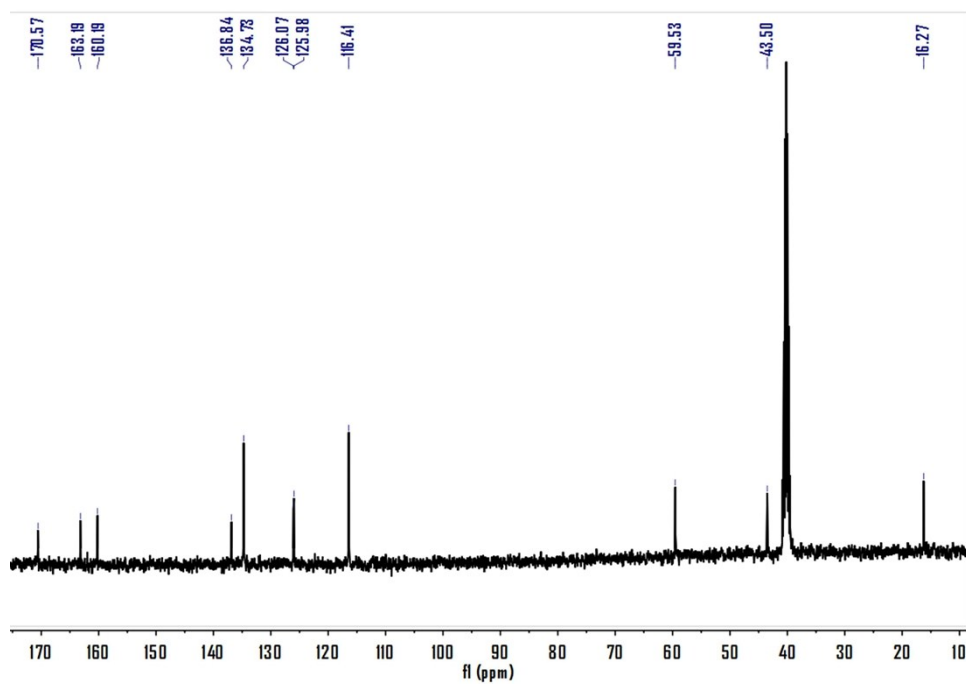

**Figure S2.** The <sup>13</sup>C NMR spectrum of HBHI.

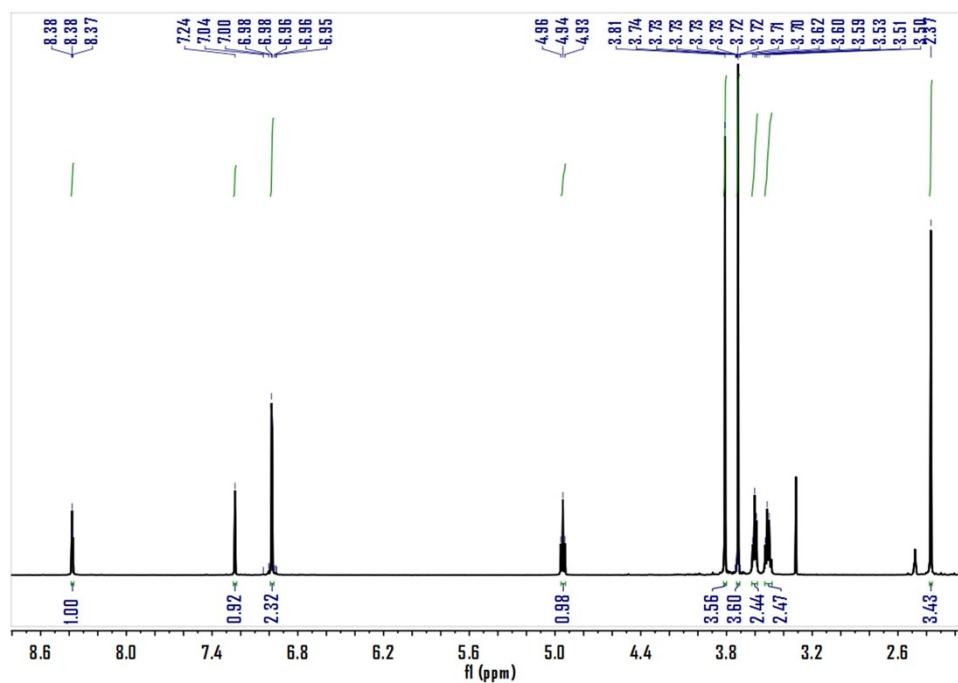

**Figure S3.** The  $^1\text{H}$  NMR spectrum of MBHI.

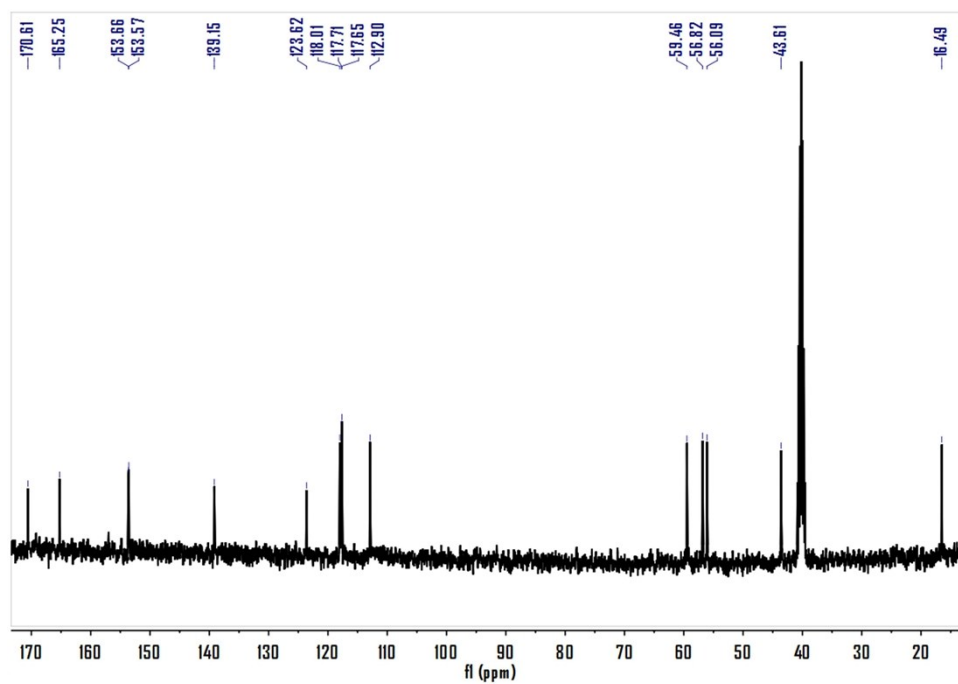

**Figure S4.** The  $^{13}\text{C}$  NMR spectrum of MBHI.

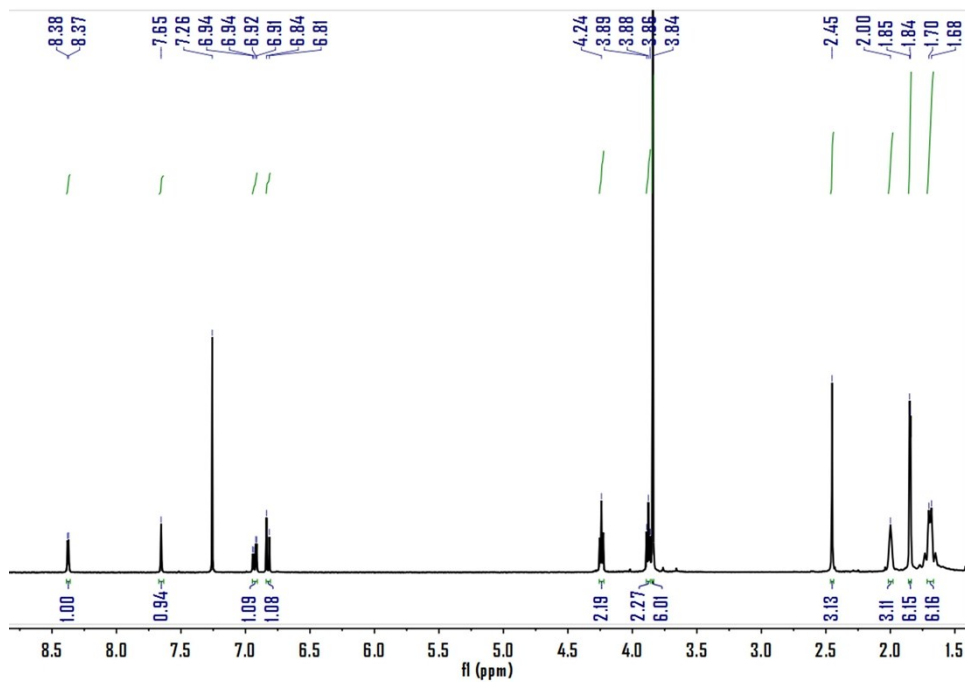

Figure S5. The  $^1\text{H}$  NMR spectrum of MBIAD.

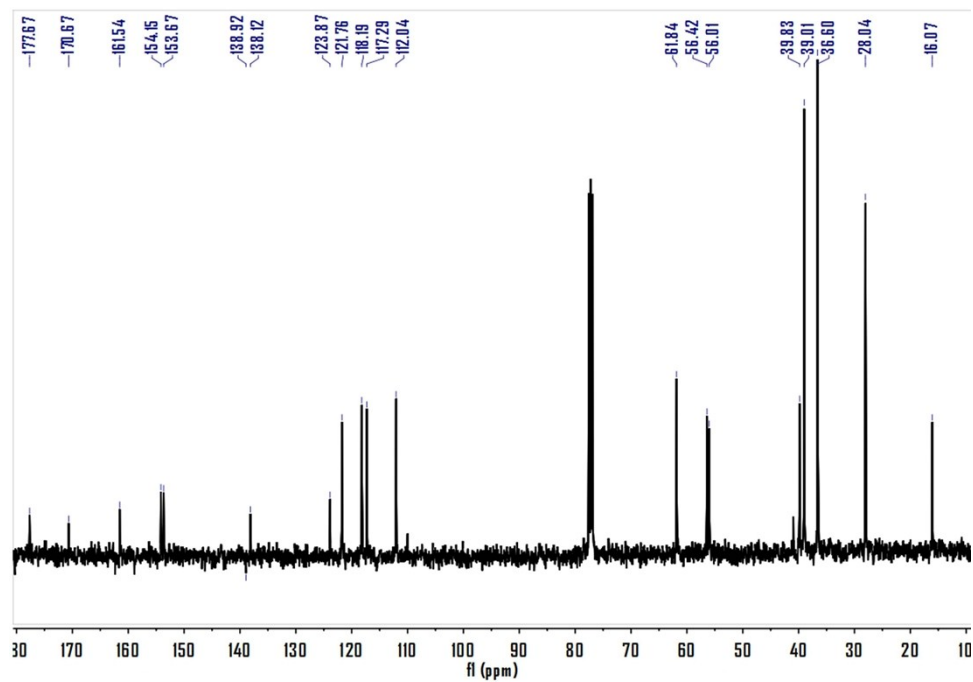

Figure S6. The  $^{13}\text{C}$  NMR spectrum of MBIAD.

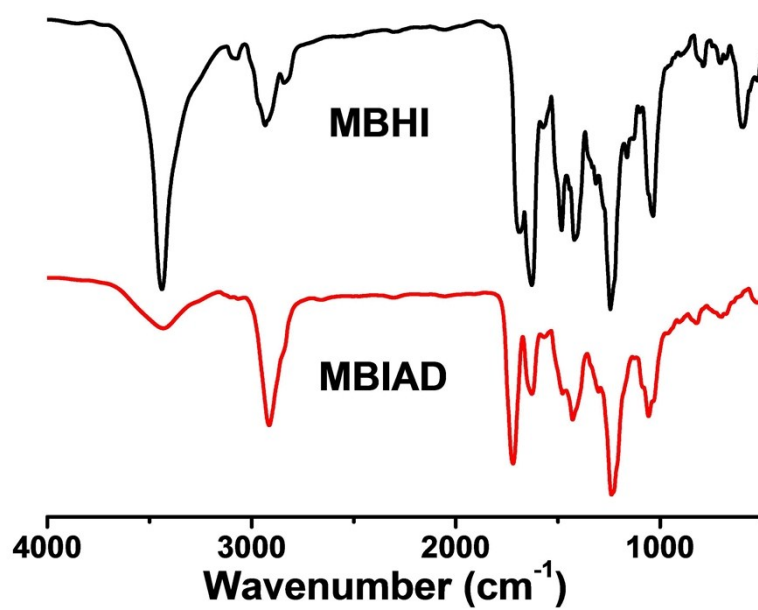

Figure S7. The IR spectra for MBHI and MBIAD.

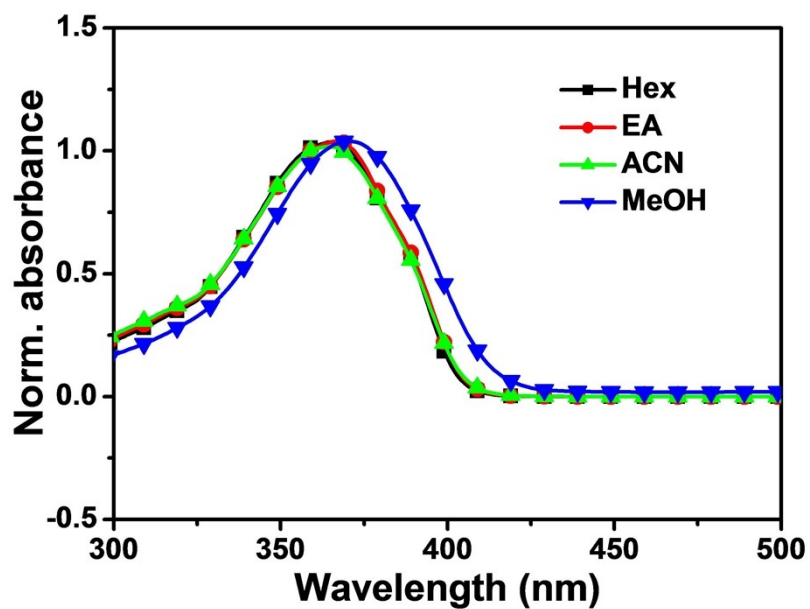

Figure S8. The normalized UV-Vis absorption of HBHI in various solvents from Hex to MeOH.

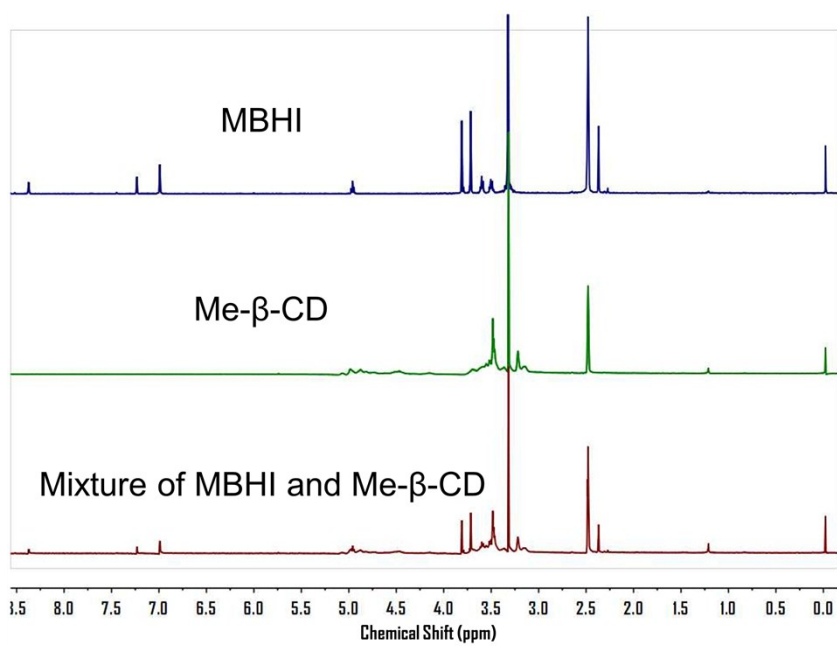

**Figure S9.** The <sup>1</sup>H NMR spectrum of MBHI, Me-β-CD and the mixture of MBHI and Me-β-CD in DMSO-*d*<sub>6</sub>, respectively.
